# Supplementary material for: Repeated self-healing of nano and micro scale cracks in epoxy based composites by tri-axial electrospun fibers including different healing agents
Source: Royal Society of Chemistry journal article supplement (doi:10.1039/c5ra15483a), 2015-01-01
Supplement: c5ra15483a1.pdf [file c5ra15483a1.pdf]

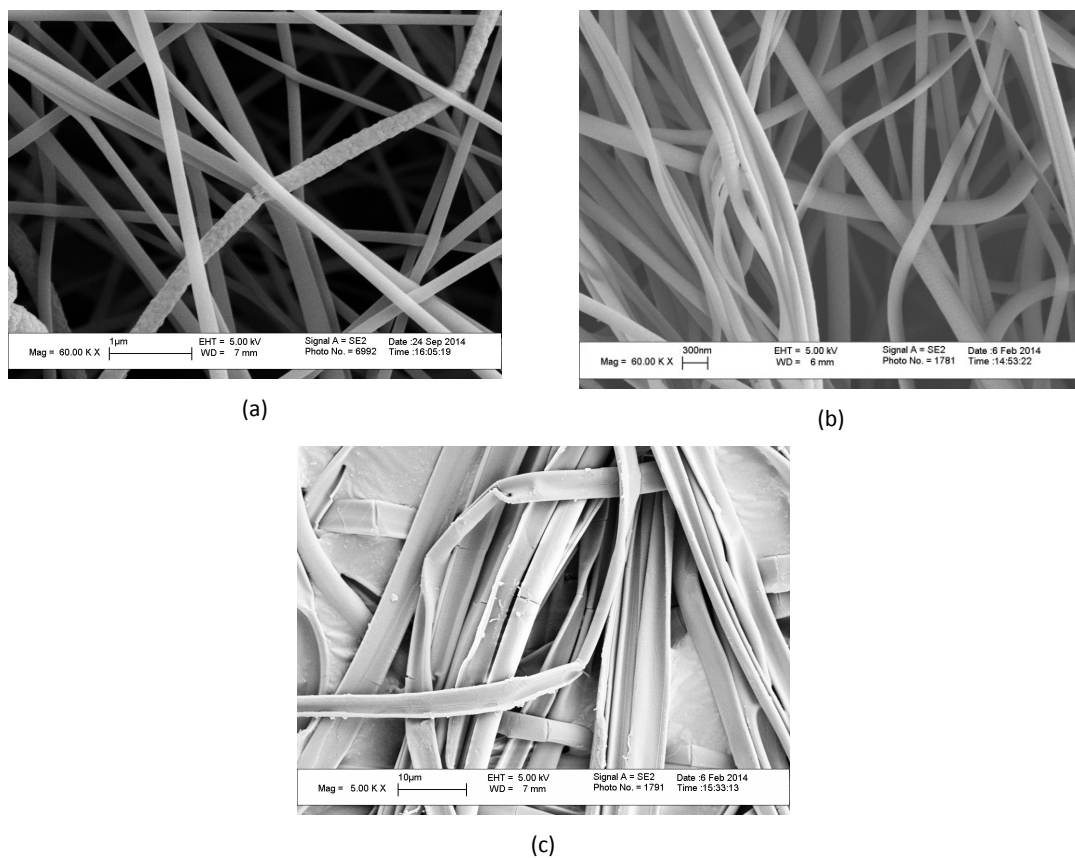

**Fig. S1** SEM images of PMMA/PAAm/DCPD tri-axial healing fibers fabricated utilizing different outer wall solvents (a) and (b) DMF, and (c) ethyl acetate at lower magnifications.

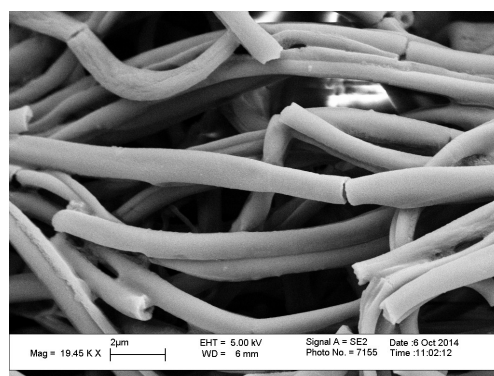

**Fig. S2** SEM image of PMMA/PAAm/hardener tri-axial healing fiber at lower magnification
